# Supplementary material for: Ocean bottom seismometer (OBS) noise reduction from horizontal and vertical components using harmonic–percussive separation algorithms
Source: Copernicus journal article supplement (doi:10.5194/se-14-181-2023), 2023-03-01
Supplement: Supplementary file 1 [file se-14-181-2023-supplement.zip]

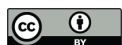

*Supplement of*

**Ocean bottom seismometer (OBS) noise reduction from horizontal and vertical components using harmonic–percussive separation algorithms**

**Zahra Zali et al.**

*Correspondence to:* Zahra Zali (zali@uni-potsdam.de)

- se-14-181-2023-supplement-title-page.pdf
- Events Table.xlsx
- NoiseCut.ipynb
- Supplemental Material.pdf

The copyright of individual parts of the supplement might differ from the article licence.
